# Supplementary material
Source: HighWire-hosted journal article supplement (https://heart.bmj.com/content/104/7/566)
Supplement: inline-supplementary-material-2 [file inline-supplementary-material-2.pdf]

**Supplementary Table 1.** Valvular dysfunction in BAV patients.

| <b>Variable</b>                       | <b>Non-significant dysfunction</b> | <b>AR-dominant</b> | <b>AS-dominant</b> | <b>P-value</b> |
|---------------------------------------|------------------------------------|--------------------|--------------------|----------------|
| N = 852                               | N = 467 (54.8%)                    | N = 201 (23.6 %)   | N = 184 (21.6%)    |                |
| <b>Demographics and clinical data</b> |                                    |                    |                    |                |
| Age, <i>years</i>                     | 46.0 ± 16.6                        | 43.3±16.2          | 55.1±15.4          | 0.0001         |
| Male, <i>n</i> (%)                    | 301 (64.4)                         | 169 (84.1)         | 128 (69.6)         | 0.0001         |
| Smoking, <i>n</i> (%)                 | 106 (22.7)                         | 57 (28,4)          | 76 (41,3)          | 0.001          |
| Hypertension, <i>n</i> (%)            | 130 (27.8)                         | 55 (27.4)          | 75 (40.8)          | 0.014          |
| Diabetes mellitus, <i>n</i> (%)       | 19 (4.1)                           | 5 (2.6)            | 20 (10.9)          | 0.001          |
| Dyslipidaemia, <i>n</i> (%)           | 77 (16.5)                          | 35 (18.2)          | 73 (39.7)          | 0.0001         |
| <b>Valve characteristics</b>          |                                    |                    |                    |                |
| Valve morphotype                      |                                    |                    |                    | 0.08           |
| Not defined, <i>n</i> (%)             | 37 (7.5)                           | 5 (2.5)            | 3 (1.6)            |                |
| BAV-RL, <i>n</i> (%)                  | 327 (70.0)                         | 146 (72.6)         | 117 (63.6)         |                |
| BAV-RN, <i>n</i> (%)                  | 93 (19.9)                          | 44 (21.9)          | 58 (31.5)          |                |
| BAV-LN, <i>n</i> (%)                  | 12 (2.6)                           | 6 (3.0)            | 6 (3.3)            |                |
| Presence of raphe, <i>n</i> (%)       | 314 (67.2)                         | 164 (82.8)         | 166 (90.2)         | 0.0001         |
| Sigmoid prolapse, <i>n</i> (%)        | 34 (7.3)                           | 64 (31.8)          | 12 (6.5)           | 0.0001         |
| Valve calcification, <i>n</i> (%)     | 40 (8.6)                           | 28 (13.9)          | 142 (77.2)         | 0.0001         |
| <b>Aortic diameter</b>                |                                    |                    |                    |                |
| Aortic annulus, mm                    | 23.0±2.90                          | 24.8±3.1           | 22.2±3.9           | 0.0001         |

|                                        |            |            |            |        |
|----------------------------------------|------------|------------|------------|--------|
| Aortic root, mm                        | 35.8±5.5   | 39.0± 5.9  | 36.1± 5.4  | 0.0001 |
| Ascending aorta, mm                    | 38.9± 7.5  | 41.5±7.1   | 43.7± 7.4  | 0.001  |
| Aortic arch, mm                        | 30.6±5.2   | 31.6±5.1   | 33.8±5.9   | 0.0001 |
| <b>Aortic dilation</b>                 |            |            |            |        |
| Dilation, <i>n</i> (%)                 | 331 (70.9) | 177 (88.1) | 155 (84.2) | 0.0001 |
| Root dilation, <i>n</i> (%)            | 140 (30.0) | 98 (48.8)  | 44 (23.9)  | 0.0001 |
| Ascending aorta dilation, <i>n</i> (%) | 313 (67.0) | 167 (83.1) | 152 (82.6) | 0.0001 |

AS, aortic stenosis; AR, aortic regurgitation; BAV, bicuspid aortic valve

**Supplementary Table 2.** Distribution of demographic, clinical, valve morphology and aortic dilation according to sex in BAV patients.

| <b>Variable</b>                       | <b>Male</b>     | <b>Female</b>   | <b>P-value</b> |
|---------------------------------------|-----------------|-----------------|----------------|
| N = 852                               | N = 598 (70.2%) | N = 254 (29.8%) |                |
| <b>Demographics and clinical data</b> |                 |                 |                |
| Age, years                            | 46.9±16.9       | 48.5±16.5       | 0.183          |
| Smoking, n (%)                        | 194 (35.7)      | 45 (17.7)       | 0.001          |
| Hypertension, n (%)                   | 194 (34.3)      | 66 (25.9)       | 0.070          |
| Diabetes mellitus, n (%)              | 32 (5.8)        | 12 (4.7)        | 0.865          |
| Dyslipidaemia, n (%)                  | 139 (25.6)      | 46 (18.1)       | 0.117          |
| <b>Valve characteristics</b>          |                 |                 |                |
| Valve morphotype                      |                 |                 | 0.423          |
| BAV-RL, n (%)                         | 425 (74.2)      | 163 (64.1)      |                |
| BAV-RN, n (%)                         | 132 (23.0)      | 63 (24.8)       |                |
| BAV-LN, n (%)                         | 16 (2.8)        | 8 (3.0)         |                |
| Presence of raphe, n (%)              | 465 (83.3)      | 179 (70.4)      | 0.084          |
| Sigmoid prolapse, n (%)               | 80 (13.4)       | 30 (11.8)       | 0.655          |
| Valve calcification, n (%)            | 157 (26.3)      | 53 (20.8)       | 0.117          |
| Valve function                        |                 |                 | 0.001          |
| Normofunctional, n (%)                | 301 (50.3)      | 166 (65.4)      |                |
| AS-dominant, n (%)                    | 128 (21.4)      | 56 (22.0)       |                |
| AR-dominant, n (%)                    | 169 (28.3)      | 32 (12.6)       |                |

| <b>Aortic dilation</b>                  |            |            |       |
|-----------------------------------------|------------|------------|-------|
| Dilation at any level, <i>n</i> (%)     | 469 (79.8) | 194 (76.3) | 0.999 |
| Root dilation, <i>n</i> (%)             | 209 (35.5) | 73 (28.7)  | 0.127 |
| Ascending aorta dilation, <i>n</i> (%)  | 442 (75.2) | 190 (78.5) | 0.325 |
| Aortic root morphotype, <i>n</i> (%)    | 106 (18.0) | 15 (5.9)   | 0.001 |
| Ascending aorta mophotype, <i>n</i> (%) | 363 (61.7) | 178 (70.0) | 0.001 |

AS, aortic stenosis; AR, aortic regurgitation; BAV, bicuspid aortic valve



**Supplementary Table 3.** Univariate and multivariate analysis for aortic dilation in BAV patients

| Variable                 | AORTIC ROOT DILATION |                  |         |                       |           |      | ASCENDING AORTA DILATION |                  |                  |                       |       |           |      |         |
|--------------------------|----------------------|------------------|---------|-----------------------|-----------|------|--------------------------|------------------|------------------|-----------------------|-------|-----------|------|---------|
|                          | Univariate analysis  |                  |         | Multivariate analysis |           |      | Univariate analysis      |                  |                  | Multivariate analysis |       |           |      |         |
|                          | Dilated              | Non-dilated      | P-value | OR                    | CI 95% OR |      | P-value                  | Dilated          | Non-dilated      | P-value               | OR    | CI 95% OR |      | P-value |
|                          |                      |                  |         | Lower                 | Upper     |      |                          |                  |                  |                       | Lower | Upper     |      |         |
|                          | N=282<br>(33.9%)     | N=551<br>(66.1%) |         |                       |           |      |                          | N=632<br>(76.1%) | N=198<br>(23.9%) |                       |       |           |      |         |
| Age, years               | 48.2±16.8            | 46.8±16.8        | 0.299   |                       |           |      |                          | 47.9±16.9        | 45.4±16.4        | 0.074                 | 1.01  | 0.99      | 1.02 | 0.063   |
| Male, n (%)              | 209 (74.1)           | 380 (69.0)       | 0.127   | 1.24                  | 0.87      | 1.78 | 0.223                    | 442 (69.9)       | 146 (73.7)       | 0.325                 |       |           |      |         |
| Hypertension, n (%)      | 98 (35.4)            | 162 (29.4)       | 0.205   | 1.28                  | 0.89      | 1.84 | 0.168                    | 206 (33.5)       | 53 (28.8)        | 0.244                 | 1.12  | 0.72      | 1.75 | 0.603   |
| Diabetes mellitus, n (%) | 10 (3.7)             | 34 (6.7)         | 0.103   | 0.65                  | 0.29      | 1.44 | 0.292                    | 30 (5.0)         | 14 (8.2)         | 0.132                 | 0.44  | 0.22      | 1.02 | 0.250   |
| Dyslipidaemia, n (%)     | 58 (21.6)            | 127 (23.0)       | 0.252   | 0.86                  | 0.56      | 1.30 | 0.483                    | 147 (24.5)       | 38 (20.0)        | 0.684                 |       |           |      |         |
| Smoking, n (%)           | 79 (28.0)            | 160 (29.0)       | 0.514   |                       |           |      |                          | 184 (29.1)       | 54 (27.2)        | 0.777                 |       |           |      |         |
| Sigmoids prolapse, n (%) | 41 (14.5)            | 69 (12.5)        | 0.449   |                       |           |      |                          | 90 (14.2)        | 20 (10.1)        | 0.150                 | 1.16  | 0.66      | 2.05 | 0.586   |

|                                        |                   |                   |               |             |             |             |              |                   |                   |               |             |             |             |              |
|----------------------------------------|-------------------|-------------------|---------------|-------------|-------------|-------------|--------------|-------------------|-------------------|---------------|-------------|-------------|-------------|--------------|
| <b>Presence of raphe, <i>n</i> (%)</b> | <b>214 (78.1)</b> | <b>430 (83.7)</b> | <b>0.066</b>  | <b>0.67</b> | <b>0.44</b> | <b>1.01</b> | <b>0.060</b> | <b>498 (81.1)</b> | <b>144 (74.3)</b> | <b>0.373</b>  |             |             |             |              |
| <b>Valve morphotype</b>                |                   |                   | <b>0.0001</b> |             |             |             |              |                   |                   | <b>0.408</b>  |             |             |             |              |
| <b>BAV-RL, <i>n</i> (%)</b>            | <b>226 (80.1)</b> | <b>360 (65.3)</b> |               |             |             |             |              | <b>460 (74.1)</b> | <b>125 (63.1)</b> |               |             |             |             |              |
| <b>BAV-RN, <i>n</i> (%)</b>            | <b>36 (13.1)</b>  | <b>159 (29.9)</b> |               | <b>0.35</b> | <b>0.23</b> | <b>0.54</b> | <b>0.001</b> | <b>143 (23.0)</b> | <b>50 (25.2)</b>  |               |             |             |             |              |
| <b>BAV-LN, <i>n</i> (%)</b>            | <b>12 (4.4)</b>   | <b>12 (2.3)</b>   |               | <b>1.45</b> | <b>0.61</b> | <b>3.44</b> | <b>0.394</b> | <b>18 (2.9)</b>   | <b>6 (3.3)</b>    |               |             |             |             |              |
| <b>Valve dysfunction</b>               |                   |                   | <b>0.0001</b> |             |             |             |              |                   |                   | <b>0.0001</b> |             |             |             |              |
| <b>Normofunctional, <i>n</i> (%)</b>   | <b>140 (49.6)</b> | <b>308 (55.9)</b> |               |             |             |             |              | <b>313 (49.5)</b> | <b>133 (67.2)</b> |               |             |             |             |              |
| <b>AS-dominant, <i>n</i> (%)</b>       | <b>44 (15.6)</b>  | <b>140 (25.4)</b> |               | <b>0.77</b> | <b>0.50</b> | <b>1.18</b> | <b>0.237</b> | <b>152 (24.1)</b> | <b>32 (16.2)</b>  |               | <b>1.59</b> | <b>1.00</b> | <b>2.52</b> | <b>0.046</b> |
| <b>AR-dominant, <i>n</i> (%)</b>       | <b>98 (34.8)</b>  | <b>103 (18.7)</b> |               | <b>2.05</b> | <b>1.41</b> | <b>2.98</b> | <b>0.001</b> | <b>167 (26.4)</b> | <b>33 (16.7)</b>  |               | <b>1.80</b> | <b>1.13</b> | <b>2.87</b> | <b>0.012</b> |

AS: aortic stenosis; AR: aortic regurgitation

**Supplementary Table 4.** Univariate and multivariate analysis for demographic, cardiovascular risk factors and valve characteristics depending on aortic root dilation and ascending aorta dilation > 45 mm.

| Variable                 | Aorta root dilation > 45 mm |                  |         |                       |           |       |         | Ascending aorta dilation > 45 mm |                    |         |                       |           |       |         |
|--------------------------|-----------------------------|------------------|---------|-----------------------|-----------|-------|---------|----------------------------------|--------------------|---------|-----------------------|-----------|-------|---------|
|                          | Univariate analysis         |                  |         | Multivariate analysis |           |       |         | Univariate analysis              |                    |         | Multivariate analysis |           |       |         |
|                          | No                          | Yes              | P-value | OR                    | CI 95% OR |       | P-value | No                               | Yes                | P-value | OR                    | CI 95% OR |       | P-value |
|                          | N = 768<br>(92.1%)          | N = 66<br>(7.9%) |         |                       | Lower     | Upper |         | N = 619<br>(74.5%)               | N = 212<br>(25.5%) |         |                       | Lower     | Upper |         |
| Age, years               | 46.7±16.8                   | 53.9±15.8        | 0.001   | 1.03                  | 1.01      | 1.05  | 0.002   | 43.7±16.3                        | 57.9±13.6          | 0.001   | 1.06                  | 1.04      | 1.07  | 0.001   |
| Male, n (%)              | 527 (68.6)                  | 63 (95.5)        | 0.001   | 6.94                  | 2.09      | 22.99 | 0.002   | 428 (69.1)                       | 161 (75.9)         | 0.066   | 1.65                  | 1.07      | 2.54  | 0.022   |
| Hypertension, n (%)      | 230 (31.2)                  | 30 (46.9)        | 0.012   | 1.12                  | 0.58      | 2.16  | 0.730   | 158 (26.9)                       | 101 (47.9)         | 0.001   | 0.98                  | 0.64      | 1.49  | 0.943   |
| Diabetes mellitus, n (%) | 43 (6.0)                    | 1 (1.6)          | 0.248   | 0.14                  | 0.01      | 1.23  | 0.077   | 27 (4.8)                         | 17 (8.2)           | 0.080   | 0.71                  | 0.33      | 1.49  | 0.368   |



|                                                 |            |           |       |      |      |      |       |            |            |       |      |      |      |       |
|-------------------------------------------------|------------|-----------|-------|------|------|------|-------|------------|------------|-------|------|------|------|-------|
| Dyslipidaemia, <i>n</i> (%)                     | 166 (23.4) | 19 (30.6) | 0.215 | 1.05 | 0.53 | 2.07 | 0.873 | 108 (17.4) | 77 (37.0)  | 0.001 | 1.20 | 0.78 | 1.84 | 0.397 |
| Smoker, <i>n</i> (%)                            | 218 (30.8) | 21 (33.3) | 0.672 |      |      |      |       | 166 (29.6) | 72 (34.8)  | 0.187 | 0.89 | 0.60 | 1.33 | 0.580 |
| Calcification, <i>n</i> (%)                     | 187 (24.3) | 23 (34.8) | 0.075 | 1.98 | 0.92 | 4.22 | 0.077 | 133 (21.5) | 77 (36.3)  | 0.001 | 0.76 | 0.46 | 1.28 | 0.315 |
| Sigmoids prolapse, <i>n</i> (%)                 | 99 (12.9)  | 11 (16.7) | 0.349 |      |      |      |       | 90 (14.5)  | 20 (9.4)   | 0.061 | 1.16 | 0.62 | 2.15 | 0.635 |
| Presence of raphe, <i>n</i> (%)                 | 595 (82.3) | 49 (75.4) | 0.180 | 0.60 | 0.29 | 1.23 | 0.16  | 466 (81.0) | 176 (83.8) | 0.405 | 0.94 | 0.57 | 1.53 | 0.815 |
| Valve morphotype                                |            |           | 0.013 |      |      |      |       |            |            | 0.058 |      |      |      |       |
| BAV-RL, <i>n</i> (%)                            | 533 (71.9) | 54 (83.1) |       |      |      |      |       | 419 (70.8) | 167 (79.1) |       |      |      |      |       |
| BAV-RN, <i>n</i> (%)                            | 188 (25.4) | 7 (10.8)  |       | 0.28 | 0.10 | 0.74 | 0.011 | 153 (25.8) | 40 (19.0)  |       | 0.59 | 0.37 | 0.92 | 0.022 |
| BAV-LN, <i>n</i> (%)                            | 20 (2.7)   | 4 (6.2)   |       | 1.48 | 0.40 | 5.44 | 0.554 | 20 (3.4)   | 4 (1.9)    |       | 0.36 | 0.11 | 1.18 | 0.094 |
| Valve function                                  |            |           | 0.001 |      |      |      |       |            |            | 0.001 |      |      |      |       |
| Non-significant valve dysfunction, <i>n</i> (%) | 429 (55.9) | 20 (30.3) |       |      |      |      |       | 363 (58.6) | 84 (39.6)  |       |      |      |      |       |
| AS-dominant, <i>n</i> (%)                       | 173 (22.5) | 11 (16.7) |       | 0.75 | 0.28 | 1.98 | 0.564 | 108 (17.4) | 76 (35.8)  |       | 2.44 | 1.40 | 4.25 | 0.002 |
| AR-dominant, <i>n</i> (%)                       | 166 (21.6) | 35 (53.0) |       | 3.97 | 2.06 | 7.65 | 0.001 | 148 (23.9) | 52 (24)a   |       | 1.62 | 1.02 | 2.60 | 0.041 |

AS, aortic stenosis; AR, aortic regurgitation.
